# Supplementary material for: Invasive Pneumococcal Disease in People Living with HIV: A Retrospective Case—Control Study in Brazil
Source: MDPI journal article supplement (doi:10.3390/tropicalmed8060328), 2023-06-19
Supplement: s1 [file s1]

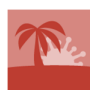

# Supplementary Materials

**Table S1.** Adjusted demographic and clinical characteristics of PLWHA with IPD who died in hospital.

|                                    | Levels        | Total | HR (IC95%)             | P-value | aHR (CI95%) | P-value |
|------------------------------------|---------------|-------|------------------------|---------|-------------|---------|
| <b>AI</b>                          |               | 8     |                        |         |             |         |
| <b>ICU Admission</b>               | ICU Admission | 8     | Ref.                   | Ref.    | Ref.        | Ref.    |
| <b>Sex at Birth</b>                | Male          | 6     | Ref.                   | Ref.    | Ref.        | Ref.    |
|                                    | Female        | 2     | 0.497 (0.1–2.46)       | 0.392   | NC          | NC      |
| <b>Smoking</b>                     | Yes           | 5     | 2.143 (0.509–9.017)    | 0.298   | NC          | NC      |
| <b>Drinking</b>                    | Yes           | 6     | 6.994 (1.387–35.279)   | 0.018   | NC          | NC      |
| <b>Drug Use</b>                    | Cocaine/crack | 3     | 1.039 (0.248–4.349)    | 0.958   | NC          | NC      |
|                                    | Cannabis      | 0     | NC                     | NC      | NC          | NC      |
| <b>COPD</b>                        | Yes           | 2     | 0.858(0.172–4.28)      | 0.851   | NC          | NC      |
| <b>DM</b>                          | Yes           | 0     | NC                     | NC      | NC          | NC      |
| <b>Liver Cirrhosis</b>             | Yes           | 5     | 8.278 (1.972–34.756)   | 0.003   | NC          | NC      |
| <b>Steroid Use</b>                 | Yes           | 1     | 3.047 (0.366–25.365)   | 0.302   | NC          | NC      |
| <b>New Case HIV</b>                | Yes           | 1     | 1.08 (0.123–9.452)     | 0.944   | NC          | NC      |
| <b>ART Use</b>                     | Not           | 1     | 1.07 (0.131–8.729)     | 0.949   | NC          | NC      |
| <b>CD4 ( cells/mm<sup>3</sup>)</b> | <100          | 3     | Ref.                   | Ref.    | Ref.        | Ref.    |
|                                    | 100–200       | 2     | 2.425 (0.38–15.489)    | 0.439   | NC          | NC      |
|                                    | >200          | 2     | 0.27 (0.045–1.62)      | 0.152   | NC          | NC      |
| <b>Prophylaxis for OI</b>          | Yes           | 5     | 1.383 (0.323–5.909)    | 0.662   | NC          | NC      |
| <b>Pneumo Vaccine</b>              | Yes           | 0     | NC                     | NC      | NC          | NC      |
| <b>Respiratory Failure</b>         | Yes           | 7     | 6.409 (0.788–52.118)   | 0.082   | NC          | NC      |
| <b>IVM</b>                         | Yes           | 8     | 4977135370.714 (0–Inf) | 0.998   | NC          | NC      |
| <b>Vasoactive Drugs</b>            | Yes           | 8     | 4977135370.714 (0–Inf) | 0.998   | NC          | NC      |
| <b>Hemodialysis</b>                | Yes           | 3     | 4.304 (1.021–18.153)   | 0.046   | NC          | NC      |
| <b>Adrenal Insufficiency</b>       | Yes           | 2     | 9.768 (1.865–51.174)   | 0.006   | NC          | NC      |

PLWHA = people living with the human immunodeficiency virus /acquired immunodeficiency syndrome; IPD = Invasive pneumococcal disease; HIV = human immunodeficiency virus; COPD = chronic obstructive pulmonary disease; DM = diabetes mellitus; ART = antiretroviral treatment; OI = opportunistic infection; IVM = invasive mechanical ventilation; NC = Not Calculated. HR (CI95%) = Hazard-ratio of progression to death after hospitalization from an infection (IPD) among levels of the features related to the reference and its 95% confidence intervals estimated by Cox proportional-hazards regression models. aHR (CI95%) = HRs adjusted for confounding variables (i.e., patients' age, birth sex, race/colour, level of education, household income, Nadir T-CD4+ count, T-CD4+ count, and viral load (the latter two being measured in the last six months of follow-up) and its 95% confidence intervals estimated by Cox proportional-hazards multiple regression mode.

**Table S2.** Data on hospitalized PLWHA with and without IPD.

| Variables                              | Total (n = 132) | IPD (n = 38) | Not IPD (n = 94) | P-value |
|----------------------------------------|-----------------|--------------|------------------|---------|
| <b>Admission to ICU</b>                | 41 (31.1%)      | 15 (39.5%)   | 26 (27.7%)       | 0.263   |
| <b>Length of ICU Stay (days)</b>       | 8 [3.75;14]     | 5 [3.5;11.5] | 8 [5;14]         | 0.327   |
| <b>Respiratory Failure</b>             | 54 (40.9%)      | 21 (55.3%)   | 33 (35.1%)       | 0.053   |
| <b>NIVM</b>                            | 32 (24.2%)      | 10 (26.3%)   | 22 (23.4%)       | 0.897   |
| <b>Invasive Mechanical Ventilation</b> | 31 (23.5%)      | 11 (28.9%)   | 20 (21.3%)       | 0.833   |
| <b>Acute Renal Failure</b>             | 68 (51.5%)      | 32 (84.2%)   | 36 (38.3%)       | < 0.001 |
| <b>Hemodialysis</b>                    | 17 (12.9%)      | 5 (13.2%)    | 12 (12.8%)       | 1       |
| <b>Vasopressor Use</b>                 | 33 (25%)        | 11 (28.9%)   | 22 (23.4%)       | 0.657   |
| <b>Cardiac Arrhythmia</b>              | 23 (17.4%)      | 6 (15.8%)    | 17 (18.1%)       | 0.951   |
| <b>Gastrointestinal Bleeding</b>       | 11 (8.3%)       | 3 (7.9%)     | 8 (8.5%)         | 1       |
| <b>Intracranial Mass Effect</b>        | 11 (8.3%)       | 0 (0%)       | 11 (11.7%)       | 0.064   |
| <b>Adrenal Insufficiency</b>           | 15 (11.4%)      | 2 (5.3%)     | 13 (13.8%)       | 0.271   |

|                                |            |            |            |       |
|--------------------------------|------------|------------|------------|-------|
| <b>In-Hospital Death</b>       | 22 (16.7%) | 8 (21.1%)  | 14 (14.9%) | 0.547 |
| <b>Death at Last Follow Up</b> | 63 (41.2%) | 19 (42.2%) | 44 (40.7%) | 1     |

PLWHA = people living with the human immunodeficiency virus/acquired immunodeficiency syndrome; IPD = Invasive pneumococcal disease; ICU = intensive care unit; NIVM = non-invasive mechanical ventilation; *P*-values were calculated for absolute (relative) frequencies by chi-squared tests.

**Table S3.** Demographic and clinical characteristics of PLWHA with IPD who died in hospital.

|                                     | Levels        | Total                | IPD Hospital Death    |                          | <i>P</i> -value   |
|-------------------------------------|---------------|----------------------|-----------------------|--------------------------|-------------------|
|                                     |               | 38                   | Yes ( <i>n</i> = 8)   | No ( <i>n</i> = 30)      |                   |
| <b>Age (years)</b>                  | Age           | 42 [35;47]           | 43.5 [38;51]          | 40 [35;46]               | 0.327             |
| <b>Sex at Birth</b>                 | Male          | 28 (62.2%)           | 6 (75%)               | 22 (59.5%)               | 0.675             |
|                                     | Female        | 17 (37.8%)           | 2 (25%)               | 15 (40.5%)               |                   |
| <b>Smoking</b>                      | Yes           | 22 (48.9%)           | 5 (62.5%)             | 17 (45.9%)               | 0.646             |
| <b>Drinking</b>                     | Yes           | 16 (35.6%)           | 6 (75%)               | 10 (27%)                 | 0.031             |
| <b>Drug Use</b>                     | Cocaine/Crack | 15 (33.3%)           | 3 (37.5%)             | 12 (32.4%)               | 0.701             |
|                                     | Cannabis      | 3 (6.7%)             | 0 (0%)                | 3 (8.1%)                 |                   |
|                                     | No            | 27 (60%)             | 5 (62.5%)             | 22 (59.5%)               |                   |
| <b>COPD</b>                         | Yes           | 13(28.9%)            | 2 (25%)               | 11 (29.7%)               | 1                 |
| <b>Liver Cirrhosis</b>              | Yes           | 9 (20%)              | 5 (62.5%)             | 4 (10.8%)                | 0.005             |
| <b>Steroid Use</b>                  | Yes           | 3 (6.7)              | 1 (12.5%)             | 2 (5.4%)                 | 1                 |
|                                     | No            | 41 (91.1%)           | 7 (87.5%)             | 34 (91.9%)               |                   |
| <b>New Case of HIV</b>              | Yes           | 4 (8.9%)             | 1 (12.5%)             | 3 (8.1%)                 | 0.113             |
|                                     | <100          | 12 (27.3%)           | 3 (42.9%)             | 9 (24.3%)                |                   |
| <b>CD4 (cells/mm<sup>3</sup>)</b>   | 100-200       | 5 (11.4%)            | 2 (28.6%)             | 3 (8.1%)                 |                   |
|                                     | >200          | 27 (61.4%)           | 2 (28.6%)             | 25 (67.6%)               |                   |
| <b>Nadir (cells/mm<sup>3</sup>)</b> | Nadir         | 117.5 [49.25;316.75] | <b>53.5 [12;93.5]</b> | <b>151.5 [80.75;334]</b> | <b>0.033</b>      |
| <b>CD4/CD8</b>                      | CD4/CD8       | 0.4[0.14;0.68]       | 0.41 [0.19;0.7]       | 0.39 [0.12;0.64]         | 0.741             |
| <b>Viral Load (copies/mL)</b>       | Detectable    | 793 [39;24821]       | 810 [39;7371.5]       | 751.5 [39;43780.25]      | 0.657             |
| <b>Use of ART</b>                   | Yes           | 40 (88.9%)           | 7 (87.5%)             | 33 (89.2%)               | 1                 |
| <b>Prophylaxis for OI</b>           | Yes           | 27 (60%)             | 5 (62.5%)             | 22 (59.5%)               | 1                 |
| <b>PPV23</b>                        | Yes           | 9 (21.8%)            | 0 (0%)                | 9 (24.3%)                | 0.284             |
| <b>PCV13</b>                        | Yes           | 1 (2.2%)             | 0(0%)                 | 1 (2.7%)                 | 1                 |
| <b>ICU Admission</b>                |               | 15 (39.5%)           | <b>8 (100%)</b>       | <b>7 (23.3%)</b>         | <b>&lt; 0.001</b> |
| <b>Days in the ICU</b>              |               | 5 [3.5;11.5]         | 4.5 [2.75;6]          | 13 [6.5;14]              | 0.062             |
| <b>Respiratory Failure</b>          |               | 21 (55.3%)           | 7 (87.5%)             | 14 (46.7%)               | 0.096             |
| <b>NIVM</b>                         |               | 10 (26.3%)           | 0 (0%)                | 10 (33.3%)               | 0.147             |
| <b>IVM</b>                          |               | 11 (28.9%)           | 8 (100%)              | 3 (10%)                  | <b>&lt; 0.001</b> |
| <b>Acute Renal Failure</b>          |               | 32 (84.2%)           | 8 (100%)              | 24 (80%)                 | 0.405             |
| <b>Hemodialysis</b>                 |               | 5 (13.2%)            | 3 (34.5%)             | 2 (6.7%)                 | 0.088             |
| <b>Vasoactive Drugs</b>             |               | 11 (28.9%)           | <b>8 (100%)</b>       | <b>3 (10%)</b>           | <b>&lt;0.001</b>  |
| <b>Cardiac Arrhythmia</b>           |               | 6 (15.8%)            | <b>5 (62.5%)</b>      | <b>1 (3.3%)</b>          | <b>&lt;0.001</b>  |
| <b>Adrenal Insufficiency</b>        |               | 2 (5.3%)             | <b>2 (25%)</b>        | <b>0 (0%)</b>            | <b>0.055</b>      |

PLWHA = people living with the human immunodeficiency virus/acquired immunodeficiency syndrome ; IPD = Invasive pneumococcal disease; HIV = human immunodeficiency virus; COPD = chronic obstructive pulmonary disease; ART= antiretroviral treatment; OI = opportunistic infection; NIVM = non-invasive mechanical ventilation; IVM= invasive mechanical ventilation; PPV23 = 23 valent pneumococcal vaccine; PCV13 = 13 valent pneumococcal vaccine; AST = Aspartate aminotransferase; ALT = Alanine aminotransferase; CRP = C-reactive protein; *P*-values were calculated for absolute (relative) frequencies by chi-squared tests.

**Table S4.** Syndromes presented by PLWHA with and without IPD.

| Variables                       | All Patients ( <i>n</i> = 153) | IPD ( <i>n</i> = 45) | Not IPD ( <i>n</i> = 108) | <i>P</i> -value |
|---------------------------------|--------------------------------|----------------------|---------------------------|-----------------|
| <b>Respiratory Syndrome</b>     | 71 (46.4%)                     | 36 (80%)             | 35 (32.4%)                | < 0.001         |
| <b>Neurological Syndrome</b>    | 23 (15%)                       | 1 (2.2%)             | 22 (20.4%)                |                 |
| <b>Digestive Tract Syndrome</b> | 15 (9.8%)                      | 6 (13.3%)            | 9 (8.3%)                  |                 |

PLWHA = people living with the human immunodeficiency virus/acquired immunodeficiency syndrome IPD = Invasive pneumococcal disease. P-values were calculated for absolute (relative) frequencies by chi-squared tests.

**Table S5.** Main opportunistic diseases in PLWHA with and without IPD.

| Variables                      | IPD                  |                      | OR (CI95%)       | <i>P</i> -value | aOR (CI95%)       | <i>P</i> -value |
|--------------------------------|----------------------|----------------------|------------------|-----------------|-------------------|-----------------|
|                                | Yes ( <i>n</i> = 45) | No ( <i>n</i> = 108) |                  |                 |                   |                 |
| <b>Tuberculosis</b>            | 4 (10.53%)           | 29 (30.85%)          | 0.26 (0.09–0.81) | 0.020           | 0.45 (0.1–1.95)   | 0.284           |
| <b>Pneumocystis Pneumonia</b>  | 3 (7.89%)            | 13 (13.83%)          | 0.53 (0.14–1.99) | 0.350           | 1.09 (0.18–6.72)  | 0.926           |
| <b>Neurotoxoplasmosis</b>      | 0 (0%)               | 10 (10.64%)          | NC               | NC              | NC                | NC              |
| <b>Cryptococcal Meningitis</b> | 2 (5.26%)            | 6 (6.38%)            | 0.81 (0.16–4.23) | 0.807           | 1.82 (0.24–13.67) | 0.562           |

PLWHA = people living with the human immunodeficiency virus /acquired immunodeficiency syndrome. IPD = Invasive pneumococcal disease; NC = Not Calculated. OR (CI95%) = Odds-ratio of having an infection (IPD) among levels of the features related to the reference and its 95% confidence intervals estimated by Logistic (Binomial) regression models. aOR (CI95%) = ORs adjusted for confounding variables (i.e., patients' age, birth sex, race/colour, level of education, household income, Nadir T-CD4+ count, T-CD4+ count, and viral load (the latter two being measured in the last six months of follow-up) and its 95% confidence intervals estimated by multiple Logistic (Binomial) regression models.

**Disclaimer/Publisher's Note:** The statements, opinions and data contained in all publications are solely those of the individual author(s) and contributor(s) and not of MDPI and/or the editor(s). MDPI and/or the editor(s) disclaim responsibility for any injury to people or property resulting from any ideas, methods, instructions or products referred to in the content.
